# Supplementary material for: Epitaxies of Ca-sulfates on calcite (CaCO3) I. Gypsum {010} on the calcite {10.4} form: epi-twins of gypsum induced by the calcite substrate
Source: Royal Society of Chemistry journal article supplement (doi:10.1039/d2ce00508e), 2022-01-01
Supplement: d2ce00508e1.pdf [file d2ce00508e1.pdf]

## Electronic Supplementary Information

### Epitaxies of Ca-sulfates on calcite (CaCO<sub>3</sub>). I. Gypsum {010} on calcite {10.4} form: epi-twins of gypsum induced by the calcite substrate

Aquilano D.,<sup>1\*</sup> Bruno M.,<sup>1,2,3</sup> Cotellucci A.,<sup>1</sup> Pastero L.,<sup>1,2,3</sup> Ghignone S.<sup>1</sup>

<sup>1</sup> Dipartimento di Scienze della Terra, Università degli Studi di Torino, Via Valperga Caluso 35, 10125, Torino (TO), Italy

<sup>2</sup> SpectraLab s.r.l., Spin-off accademico dell'Università degli Studi di Torino, Via G. Quarello 15/a, 10135, Torino (TO), Italy

<sup>3</sup> NIS, Centre for Nanostructured Interfaces and Surfaces, Università degli Studi di Torino, Via G. Quarello 15/a, 10135, Torino (TO), Italy

\*Corresponding author

e-mail: [dino.aquilano@unito.it](mailto:dino.aquilano@unito.it)

**Table S1.** 2D coincidences between substrate {10.4}<sub>C</sub> and deposit {010}<sub>G</sub>. Less innovative and higher rankings with respect to Tables 1 and 2 (main text) have been here listed.

| Ranking | {10.4} <sub>C</sub> lattice vectors (Å)                                            | {010} <sub>G</sub> lattice Vectors (Å)               | Maximum linear and area misfit (Δ%) | Obliquity | Notes and linear misfits                         |
|---------|------------------------------------------------------------------------------------|------------------------------------------------------|-------------------------------------|-----------|--------------------------------------------------|
|         | $\frac{1}{3} \times [4\bar{1}\bar{1}] = 9.516$<br>$3 \times [010] = 14.969$        | $[\bar{1}01] = 9.941$<br>$-[301] = 15.461$           | +4.46<br>+3.29                      |           | $[\bar{1}01]_G$ is not relevant for epitaxy      |
| 3a      | (3×) 121.293                                                                       | (4×) 128.339                                         | +5.81                               | 2.633°    | Coherent linear misfits                          |
|         | $\frac{1}{3} \times [7441] = 12.85$<br>$\frac{1}{3} \times [4.11.\bar{1}] = 17.02$ | $2 \times [001] = 12.46$<br>$3 \times [100] = 16.86$ | -3.13<br>-0.95                      |           | To be better investigated; $[001]_G$ is relevant |
| 3b      | (5×) 202.153                                                                       | (6×) 192.508                                         | -5.01                               | 1.35°     | Coherent linear misfits                          |
|         | $-\frac{1}{3} \times [48\bar{1}] = 12.85$                                          | $2 \times [001] = 12.46$<br>$3 \times [100] = 16.86$ | -3.13<br>-0.57                      |           | To be better investigated; $[001]_G$ is          |

|    |                                                                        |                                             |                |       |                         |
|----|------------------------------------------------------------------------|---------------------------------------------|----------------|-------|-------------------------|
|    | $\frac{1}{\sqrt{3}}[81\bar{2}] = 16.957$                               |                                             |                |       | relevant                |
| 3c | (5×) 202.153                                                           | (6×) 192.508                                | -5.01          | 1.86° | Coherent linear misfits |
|    |                                                                        |                                             |                |       |                         |
|    | $-2 \times [010] = 9.979$<br>$[42\bar{1}] = 24.309$                    | $[201] = 10.474$<br>$[10\bar{3}] = 22.425$  | +4.95<br>-8.40 |       |                         |
| 4  | (6×) 242.584                                                           | (7×) 234.684                                | -3.36          | 2.33° | Opposite linear misfits |
|    | $-3 \times [010] = 14.969$<br>$\frac{2}{\sqrt{3}}[42\bar{1}] = 16.206$ | $-[102] = 16.148$<br>$[30\bar{2}] = 16.639$ | +7.88<br>+2.67 |       |                         |
| 5  | (6×) 242.584                                                           | (8×) 268.21                                 | +10.56         |       | Coherent linear misfits |

Other 2D-CCs (having higher coincidences lattices) have been finely illustrated in the Supporting Information of the following paper:

L. Pastero, R. Giustetto and D. Aquilano, *CrystEngComm*, 2017, **19**, 3649-3659.
